Jonathan P. Wanderer, M.D., M.Phil., F.A.S.A., F.A.M.I.A.,  
Gen Li, M.Stat., M.Chem., Robert E. Freundlich, M.D., M.S.,  
M.S.C.I. Vanderbilt University Medical Center, Nashville,  
Tennessee (J.P.W.). jon.wanderer@vumc.org

DOI: 10.1097/ALN.0000000000003979

## References

1. Leslie K, Peyton PJ, Story DA: Risk of postoperative pulmonary complications: Comment. *ANESTHESIOLOGY* 2021; 135:928–30
2. Li G, Freundlich RE, Gupta RK, Hayhurst CJ, Le CH, Martin BJ, Shotwell MS, Wanderer JP: Postoperative pulmonary complications' association with sugammadex *versus* neostigmine: A retrospective registry analysis. *ANESTHESIOLOGY* 2021; 134:862–73
3. Shiloach M, Frencher SK Jr, Steeger JE, Rowell KS, Bartzokis K, Tomeh MG, Richards KE, Ko CY, Hall BL: Toward robust information: Data quality and interrater reliability in the American College of Surgeons National Surgical Quality Improvement Program. *J Am Coll Surg* 2010; 210:6–16
4. Abbott TEF, Fowler AJ, Pelosi P, Gama de Abreu M, Möller AM, Canet J, Creagh-Brown B, Mythen M, Gin T, Lalu MM, Futier E, Grocott MP, Schultz MJ, Pearse RM; StEP-COMPAC Group: A systematic review and consensus definitions for standardised end-points in perioperative medicine: Pulmonary complications. *Br J Anaesth* 2018; 120:1066–79
5. Robinson M, Davidson A: Aspiration under anaesthesia: Risk assessment and decision-making. *Contin Ed Anaesth Crit Care Pain* 2014; 14:171–5

(Accepted for publication August 18, 2021. Published online first on September 22, 2021.)

# One-lung Ventilation and Complications: Comment

## To the Editor:

With interest, we read the article by Colquhoun *et al.* on the association between a tidal volume regimen during one-lung ventilation and postoperative pulmonary complications.<sup>1</sup> In the article's title and Discussion section, the authors claim that the tidal volume regimen was not associated with the studied outcome, and in the Results section, they explicitly report a "lack of association."

While it is not our intention to criticize or debase this otherwise excellent study, we would like to address

a fundamental statistical misconception that we regularly observe in medical literature: the misinterpretation of non-significant hypothesis test results as evidence for the lack of a difference, effect, or association.

A nonsignificant result of a superiority test merely means that there is insufficient evidence to reject the null hypothesis and claim a difference, effect, or association. Importantly, however, it does not exclude clinically important differences, and thus does not imply that treatments (or whatever exposure is being studied) have equivalent effects on (or association with) some outcome.<sup>2</sup>

Rather than focusing on only statistical significance, we would like to highlight the importance of considering the CI of the effect size estimate when interpreting study results.<sup>3</sup> Inferences from a study should apply to the population from which the data were sampled, not to the sample itself, and the CI provides a range of plausible estimates of what the "true" effect (or association) could be in that population. More formally, the CI contains the true population parameter in a fixed percentage of cases with repeated sampling, and this fixed percentage—often arbitrarily set at 95%—is termed the *confidence level*. This means that if a study was to be repeated indefinitely under the same conditions, each time with a new sample from the same population, and if the 95% CI for the treatment effect were computed each time, 95% of the varying CIs would contain the unknown true population parameter. In contrast to common belief, this does not mean that there is a 95% probability that any particular CI contains the true population parameter. For example, in the study by Colquhoun *et al.*, the confounder adjusted odds ratio was 0.86 with a 95% CI of 0.56 to 1.32. Let us assume that the true odds ratio that authors aim to estimate (which, of course, is actually unknown) is, say, 0.9. Now, it does not make any sense to say that there is a 95% probability that 0.9 falls within the range between 0.56 and 1.32. The CI either contains the unknown true population value or does not, and the probability of containing this value is therefore either 1 or 0. In practice, it is generally unknown whether or not a particular CI contains the population parameter of interest. However, the vast majority of 95% CIs do contain the parameter, and thus, there is a good reason to believe that a particular 95% CI estimated in a study "likely" (even though we cannot assign a specific probability) includes the population parameter.

While statistical significance and CIs are often thought of as two distinct entities, they are actually closely related: when the 95% CI contains the null-hypothesis value of no effect (or no association)—for example, 1 for an odds ratio or 0 for a mean difference—the data are compatible with the lack of an effect, and a corresponding hypothesis test at a  $100\% - 95\% = 5\%$  (0.05) significance level would be "nonsignificant" (*i.e.*, would result in a  $P > 0.05$ ).<sup>4</sup> However, being compatible with the lack of an effect can still

mean also being compatible with clinically important effects, as the entire CI needs to be considered. Returning to the study by Colquhoun *et al.*, the CI suggests that the odds of postoperative pulmonary complications could plausibly be somewhere between 44% lower and up to 32% higher in one treatment group compared to the other. This is a difference that most clinicians would probably consider clinically relevant, and thus, the study does *not* demonstrate the lack of a clinically important association in either direction. The same is true in many other articles reporting nonsignificant study results. We believe it is important that authors and readers are aware that absence of evidence must not be confused with evidence of absence. A nonsignificant difference between treatment groups should be interpreted and reported in terms of insufficient evidence to reject the null hypothesis, but neither demonstrates the lack of a difference, nor the equivalence of treatments.

### Competing Interests

The authors declare no competing interests.

Patrick Schober, Ph.D., Stephan Alexander Loer, Ph.D., Lothar Andreas Schwarte, Ph.D. Amsterdam UMC, Vrije Universiteit Amsterdam, The Netherlands (all authors).  
p.schober@amsterdamumc.nl

The corresponding author of the original article referenced above has read the letter and does not have anything to add in a published reply.

DOI: 10.1097/ALN.0000000000003932

### References

1. Colquhoun DA, Leis AM, Shanks AM, Mathis MR, Naik BI, Durieux ME, Kheterpal S, Pace NL, Popescu WM, Schonberger RB, Kozower BD, Walters DM, Blasberg JD, Chang AC, Aziz ME, Harukuni I, Tieu BH, Blank RS: A Lower tidal volume regimen during one-lung ventilation for lung resection surgery is not associated with reduced postoperative pulmonary complications. *ANESTHESIOLOGY* 2021; 134:562–76
2. Schober P, Vetter TR: Noninferiority and equivalence trials in medical research. *Anesth Analg* 2020; 131:208–9
3. Schober P, Bossers SM, Schwarte LA: Statistical significance *versus* clinical importance of observed effect sizes: What do *P* values and confidence intervals really represent? *Anesth Analg* 2018; 126:1068–72
4. Schober P, Vetter TR: Confidence intervals in clinical research. *Anesth Analg* 2020; 130:1303

(Accepted for publication July 16, 2021. Published online first on September 8, 2021.)

## One-lung Ventilation and Complications: Comment

### To the Editor:

With great interest we have read the article by Douglas A. Colquhoun *et al.*<sup>1</sup> regarding the effect of lower tidal volume ventilation on postoperative pulmonary complication in patients undergoing lung resection surgery with one-lung ventilation. There are two important points of concern.

First, an *a priori* test was used to calculate the sample size by using a two-sided Z test with unpooled variance, and the results showed that 1,315 unmatched cases in each group (total study *N* = 2,630) provided 90% power at an  $\alpha = 0.05$  to detect a 5% difference. However, the Z test was used to calculate the sample size, whereas the conditional logistic regression model was used to analyze the relationship of protective ventilation and pulmonary complication (main outcome), and only 762 patients matched were enrolled in the logistic regression. We think that the sample size should be calculated according to the main outcome and corresponding main statistical analysis method, rather than using a different statistical method. Therefore, the power (90%) based on the Z test and corresponding sample size may mislead readers to believe the conclusion too much. Although there are many multivariate power analysis methods, none of them is generally accepted and feasible; therefore, we suggest that the authors use univariate power analysis with logistic regression to provide accurate power.<sup>2</sup>

Second, although this study defined the criteria of one-lung protective ventilation as both tidal volumes equal to or less than 5 ml/kg predicted body weight and median positive end-expiratory pressure greater than or equal to 5 cm H<sub>2</sub>O, the generally accepted definition of lung protective ventilation contained (1) tidal volume equal to or less than 5 ml/kg predicted body weight, (2) positive end-expiratory pressure greater than or equal to 5 cm H<sub>2</sub>O, and (3) lung recruitment maneuvers.<sup>3</sup> In addition, recruitment maneuvers are an important component of lung protective ventilation to reduce postoperative pulmonary complications.

### Competing Interests

The authors declare no competing interests.

Yihao Zhu, M.S., Fei Wang, M.S., Tao Zhu, M.D. West China Hospital of Sichuan University, Chengdu, China (T.Z.).  
739501155@qq.com

The corresponding author of the original article referenced above has read the letter and does not have anything to add in a published reply.

DOI: 10.1097/ALN.0000000000003933
